# Supplementary material for: Rapid synthesis of hollow PtPdCu trimetallic octahedrons at room temperature for oxygen reduction reactions in acid media
Source: Royal Society of Chemistry journal article supplement (doi:10.1039/c9ce01422e), 2019-10-08
Supplement: c9ce01422e1.pdf [file c9ce01422e1.pdf]

## Supporting Information Available

### **Rapidly synthesis of hollow PtPdCu trimetallic octahedrons at room temperature for oxygen reduction reaction in acid media**

Ruopeng Zhao,<sup>a,b</sup> Zhijing Chen,<sup>a</sup> Shaoming Huang<sup>a,\*</sup>

a. Guangzhou Key Laboratory of Low-Dimensional Materials and Energy Storage Devices, School of Materials and Energy, Guangdong University of Technology, Guangzhou, 510006, PR China.

b. School of Chemical and Biomedical Engineering, Nanyang Technology University, Singapore 637459, Singapore 637459, Singapore.

E-mail: smhuang@gdut.edu.cn; smhuang@wzu.edu.cn.

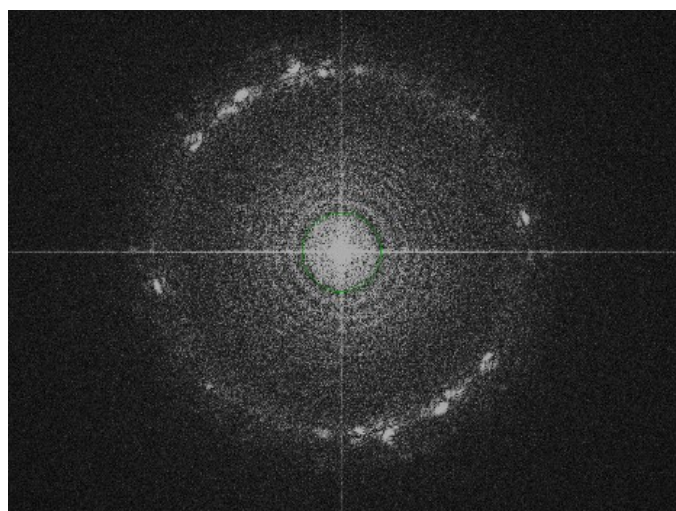

**Figure S1. The SAED pattern of PtPdCu HTOs.**

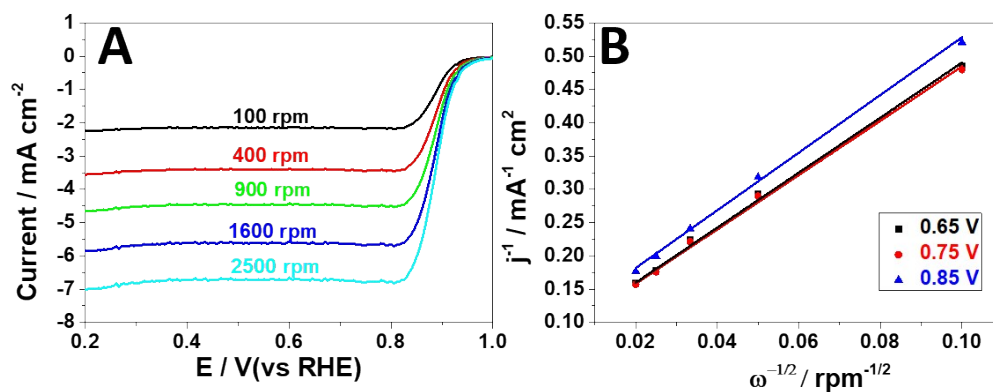

Figure S2. (A) LSV curves of PtPdCu HTOs at various rotation rates. (B) Koutecky-Levich plots at different potentials.

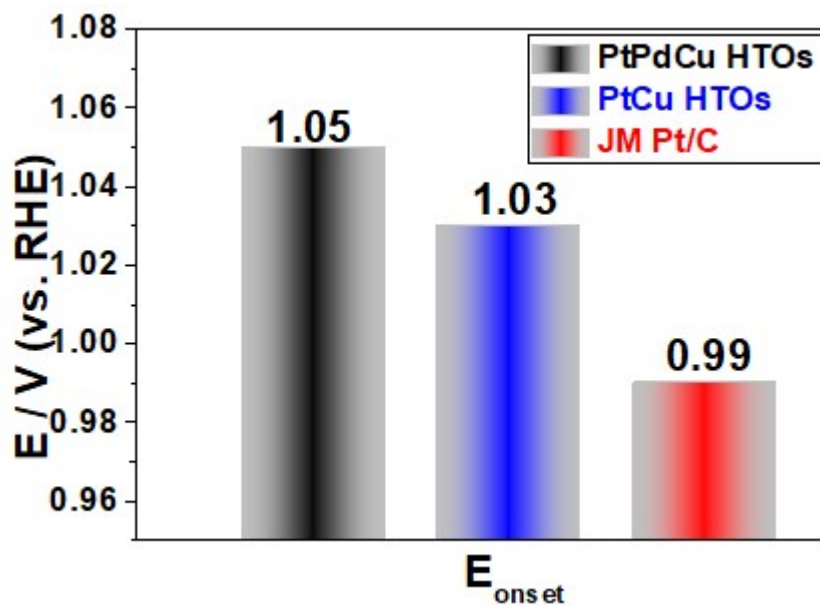

Figure S3.  $E_{\text{onset}}$  of the catalysts

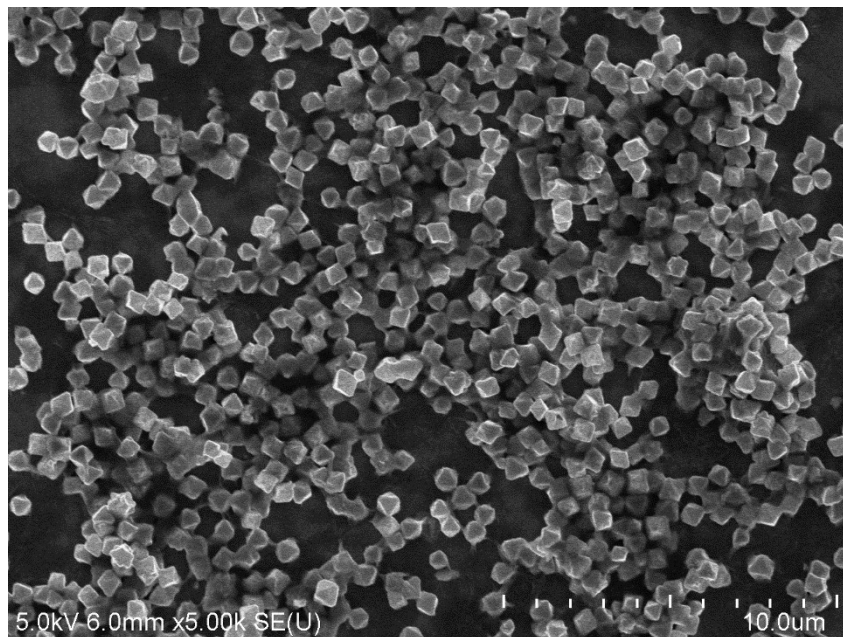

**Figure S4. SEM image of PtPdCu HTOs after accelerated durability test**

**Table S1 Activity comparison of Pt-based catalysts toward ORR**

| No | Catalysts                                                  | Mass Activity (A mg <sup>-1</sup> ) | Specific Activity ( mA cm <sup>-2</sup> ) | Electrolyte             | Ref.                                        |
|----|------------------------------------------------------------|-------------------------------------|-------------------------------------------|-------------------------|---------------------------------------------|
| 1  | PtPdCu HTOs                                                | 0.51                                | 0.82                                      | 0.1 M HClO <sub>4</sub> | This work                                   |
| 2  | Pt-Ta <sub>2</sub> O <sub>5</sub> /CNT                     | 0.23                                | 5.46                                      | 0.1 M HClO <sub>4</sub> | Chem. Sci., 2019, 10, 5589                  |
| 3  | Pd@Pt Core-Shell Nanodots Arrays                           | 0.2                                 | 0.24                                      | 0.1 M HClO <sub>4</sub> | ACS Appl. Nano Mater. 2019, 2, 3695         |
| 4  | C-FeNiPt/Pt-skin NWs                                       | 0.47                                | 2.02                                      | 0.1 M HClO <sub>4</sub> | small 2015, 11, 3545                        |
| 5  | Pt nanoclusters                                            | 0.198                               | 0.216                                     | 0.1 M HClO <sub>4</sub> | Electrochimica Acta, 2019, 297, 539         |
| 6  | Stable platinum nanoclusters on genomic DNA-graphene oxide | 0.317                               | 0.23                                      | 0.1 M HClO <sub>4</sub> | Nat Commun. 2013, 4, 2221                   |
| 7  | Pt Nanocluster Decorated Pd Hierarchical Structures        | 0.11                                | 0.18                                      | 0.1 M HClO <sub>4</sub> | ACS Appl. Mater. Interfaces, 2015, 7, 17162 |
| 8  | NiGLAD{Pt-1500}/GC                                         | 0.204                               | 0.31                                      | 0.1 M HClO <sub>4</sub> | Electrochimica Acta 176                     |

|           |                                           |             |             |                        |                                                          |
|-----------|-------------------------------------------|-------------|-------------|------------------------|----------------------------------------------------------|
|           |                                           |             |             |                        | (2015) 620–626                                           |
| <b>9</b>  | <b>Pt/TiC</b>                             | <b>0.4</b>  | <b>/</b>    | <b>0.1 M<br/>HClO4</b> | <b>Catalysts<br/>2015, 5, 966-<br/>980</b>               |
| <b>10</b> | <b>Cu-Pt Core-Shell<br/>Nanoparticles</b> | <b>0.26</b> | <b>0.49</b> | <b>0.1 M<br/>HClO4</b> | <b>J.<br/>Electrochem.<br/>Soc. 2012, 7,<br/>234-241</b> |
